# Supplementary material
Source: publisher figshare collection journal article supplement (https://frontiersin.figshare.com/ndownloader/files/22530101)
Supplement: Supplementary file [file 22530101]

## Supplementary Material

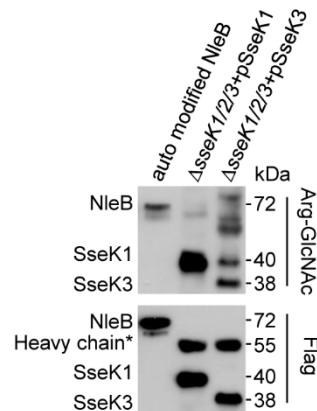

**Supplementary Figure 1 Auto-arginine-GlcNAcylation of SseK1 and SseK3 during bacterial infection.** HeLa cells were infected with indicated *Salmonella* strains for 16 h. Cells were lysed and proteins were immunoprecipitated with anti-Flag beads. Samples were analyzed by SDS-PAGE and immunoblotted with indicated antibodies. Anti-Flag was shown as a loading control. Auto-modified NleB was used as a reference. The asterisk indicated the heavy chain. Data represent at least three repetitions.

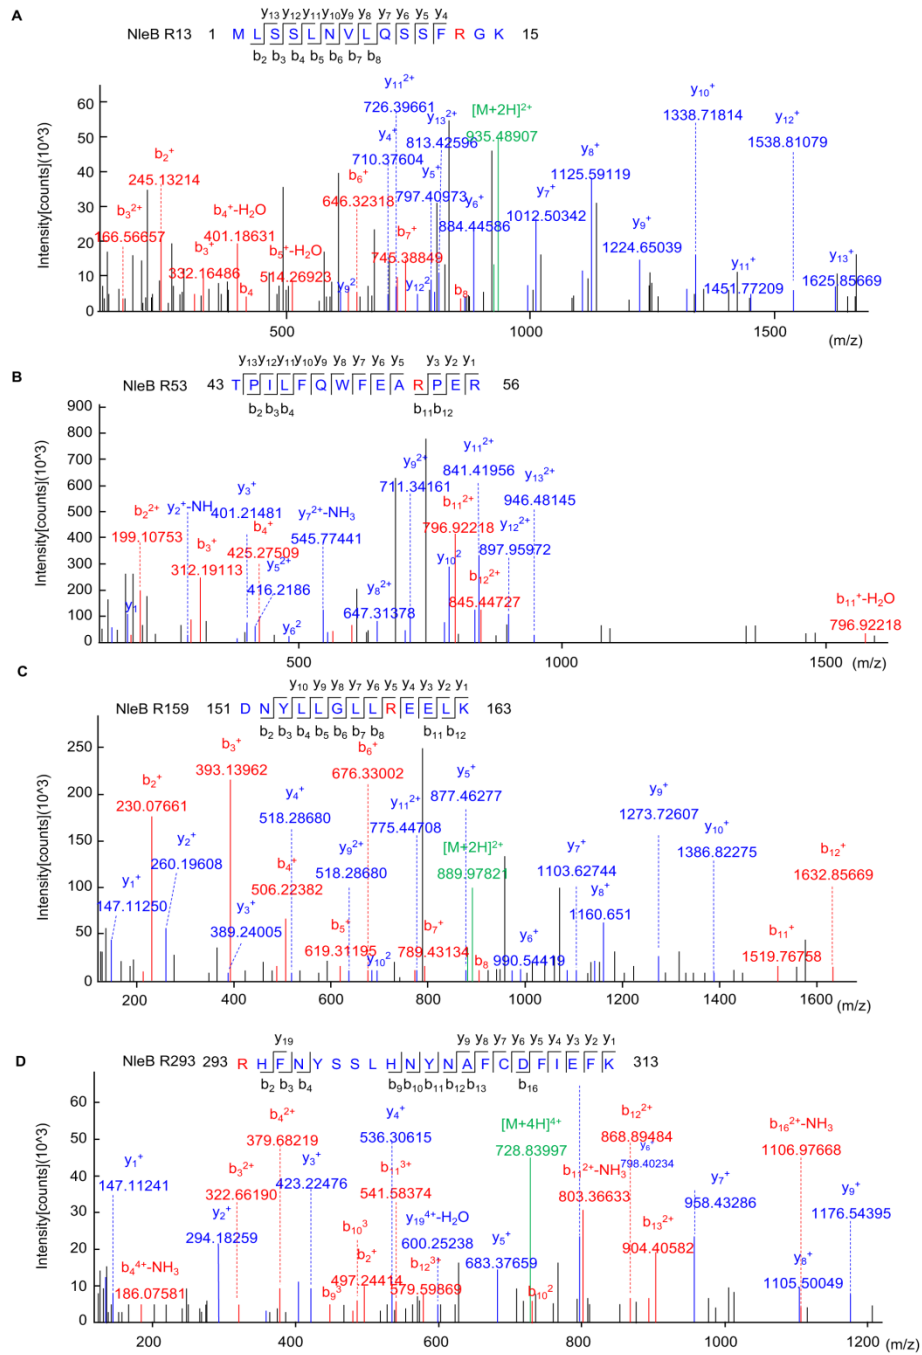

**Supplementary Figure 2 HCD analysis of the peptides GlcNAcylated by NleB.** HCD mass spectrum of Arg13 (A), Arg53 (B), Arg159 (C), and Arg293 (D) containing tryptic peptide from NleB in bacteria. The fragmentation patterns of the generated  $b$  and  $y$  ions were displayed along the peptide sequence on top of the spectrum.

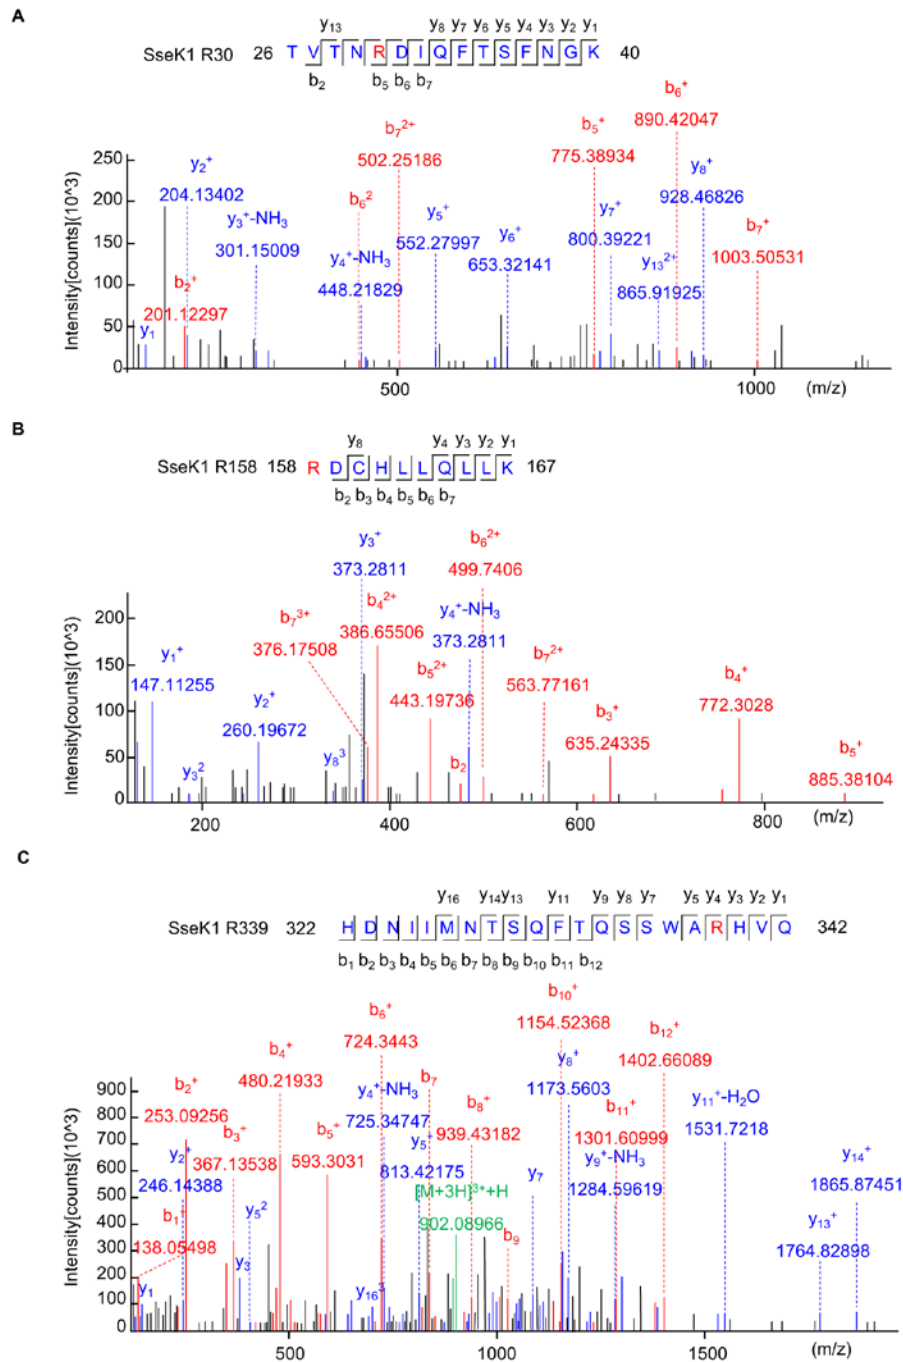

**Supplementary Figure 3 HCD analysis of the peptides GlcNAcylated by SseK1.** HCD mass spectrum of Arg30 (A), Arg158 (B), and Arg339 (C) containing tryptic peptide from SseK1 in bacteria. The fragmentation patterns of the generated  $b$  and  $y$  ions were shown along the peptide sequence on top of the spectrum.

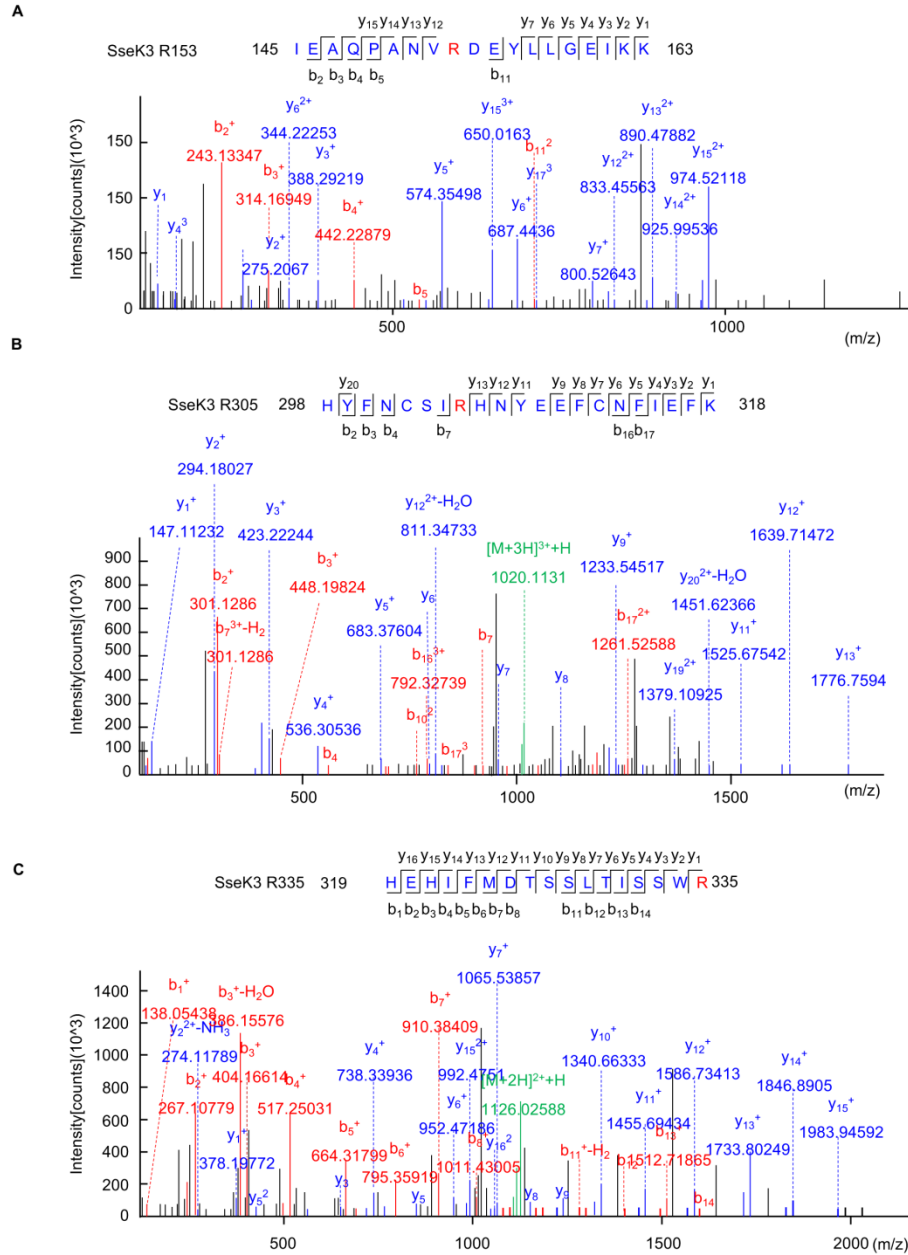

**Supplementary Figure 4 HCD analysis of the peptides GlcNAcylated by SseK3.** HCD mass spectrum of Arg153 (A), Arg305 (B), and Arg335 (C) containing tryptic peptide from SseK3 in bacteria. The fragmentation patterns of the generated  $b$  and  $y$  ions were exhibited along the peptide sequence on top of the spectrum.

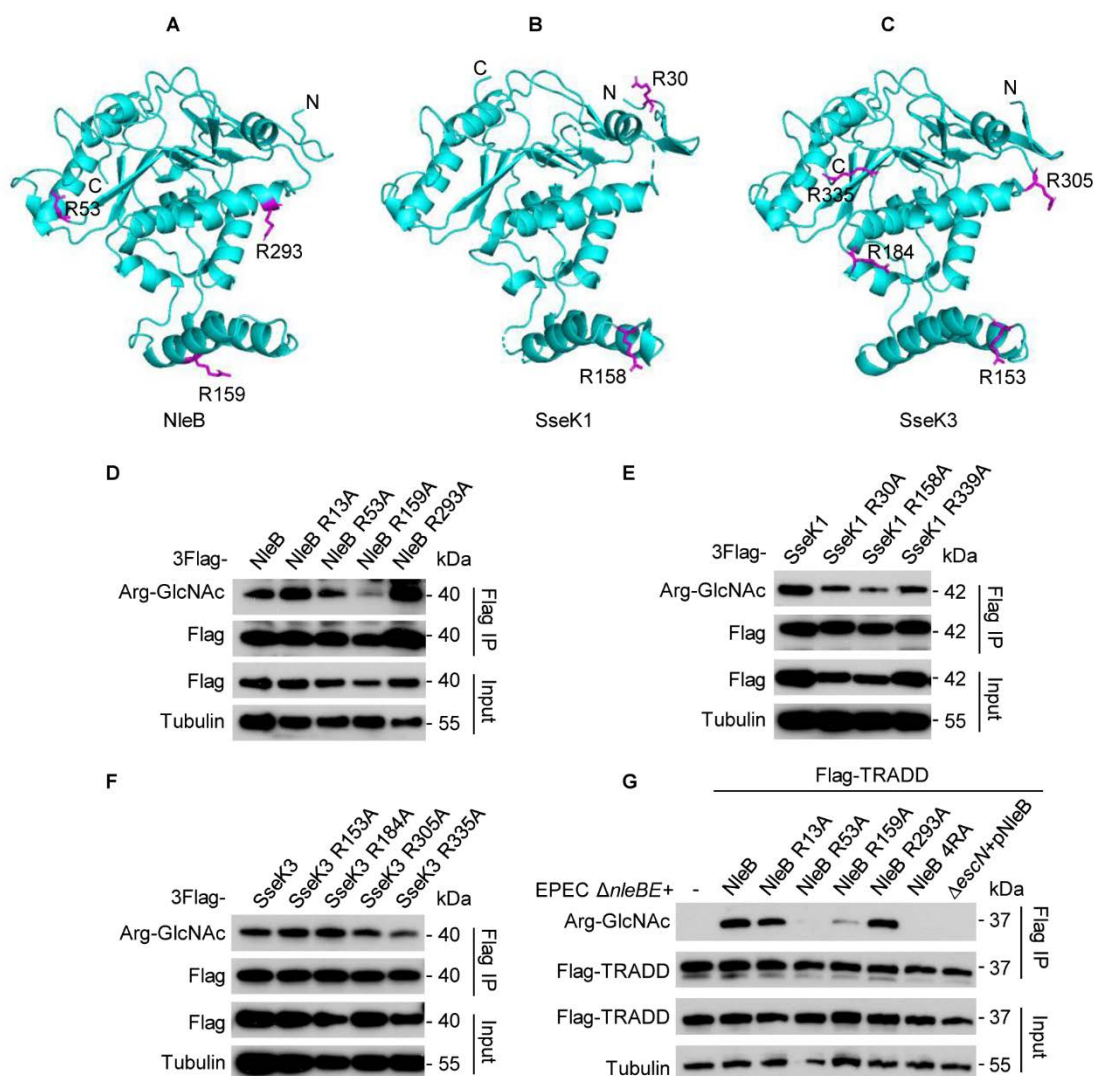

**Figure S5 GlcNAcylation activity of single mutations of the auto modification sites of NleB and SseK1/3.** (A-C) Overall structure of NleB and SseK1/3. Shown are the cartoon representation of NleB (A) (PDB code, 6ACI), SseK1 (B) (PDB code, 6IXK), and SseK3 (C) (PDB code, 6EYT) in cyan color, respectively. Arginine residues on the auto modification sites are shown as sticks in magenta color. The R13 in NleB and R339 in SseK1 are not shown because they are not visible in the whole structure. (D-F) GlcNAcylation activity of single mutations of the auto modification sites of NleB and SseK1/3. 293T cells were transfected with the indicated plasmids. Immunoprecipitants (Flag IP) and cell lysates (Input) were loaded onto SDS-PAGE gels, followed by immunoblot with anti-Flag, anti-Arg-GlcNAc antibody, and a loading control anti-tubulin. (G) Modification of protein substrates by NleB and its single mutation during bacterial infection. 293T cells transfected with indicated plasmids were infected with EPEC strains and subjected to anti-Flag immunoprecipitation and immunoblotting. Data in (D-G) are representative from at least three repetitions.

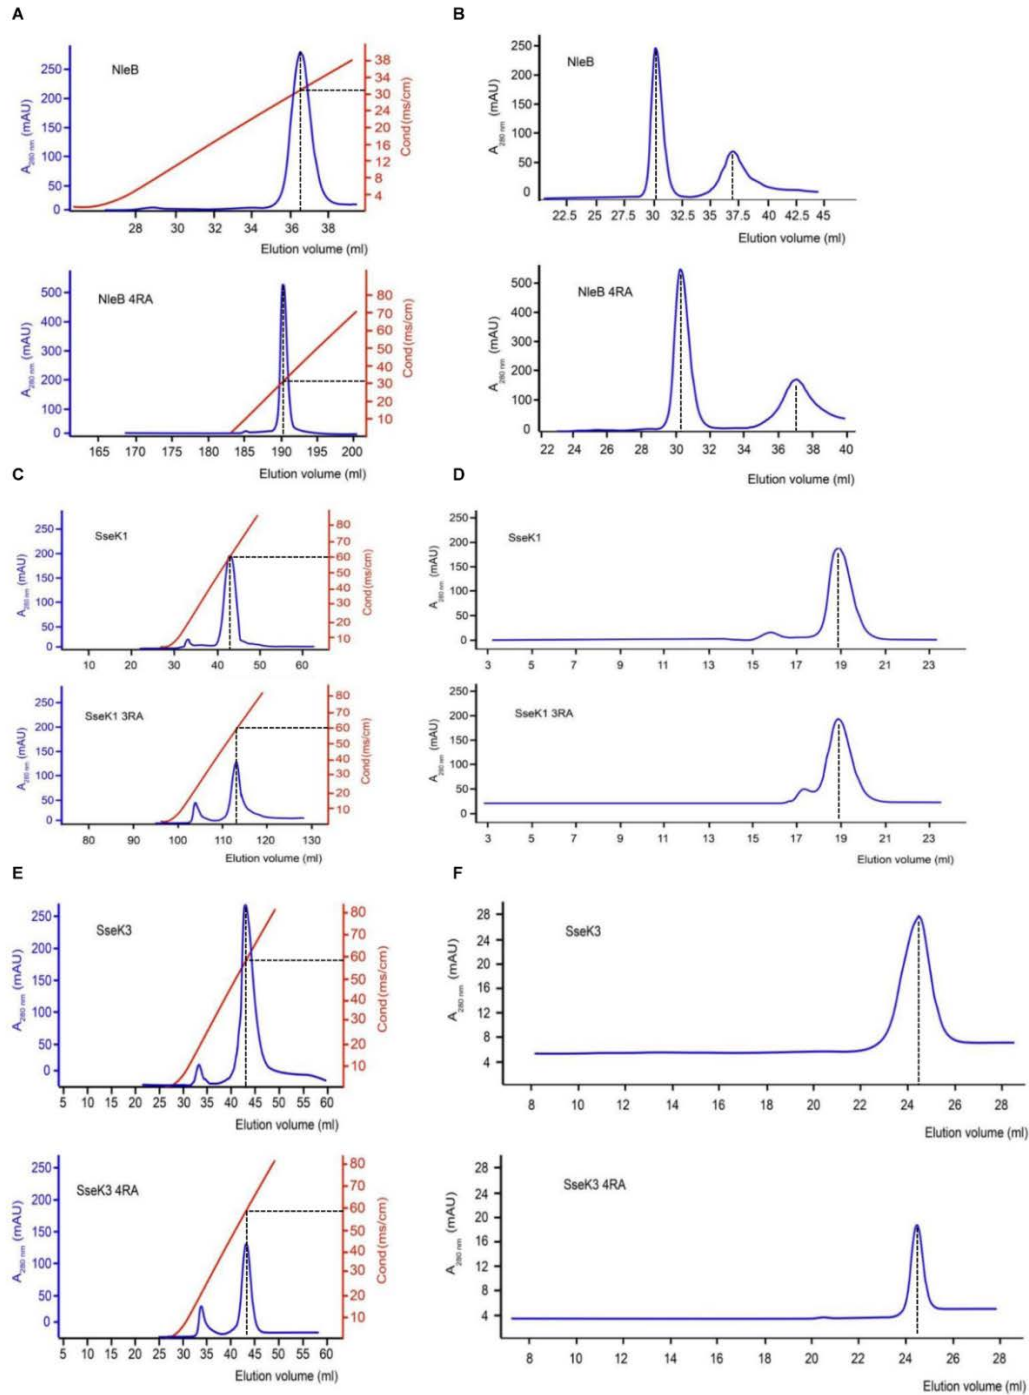

**Supplementary Figure 6 Biochemical characterization of NleB/SseK and their RA mutants. (A, B)** Ion-exchange (A) and gel-filtration (B) chromatography of recombinant wild type NleB or an indicated NleB 4RA mutant protein. **(C, D)** Ion-exchange (C) and gel-filtration (D) chromatography of recombinant wild type SseK1 or an indicated SseK1 3RA mutant protein. **(E, F)** Ion-exchange (E) and gel-filtration (F) chromatography of recombinant wild type SseK3 or an indicated SseK3 4RA mutant protein.

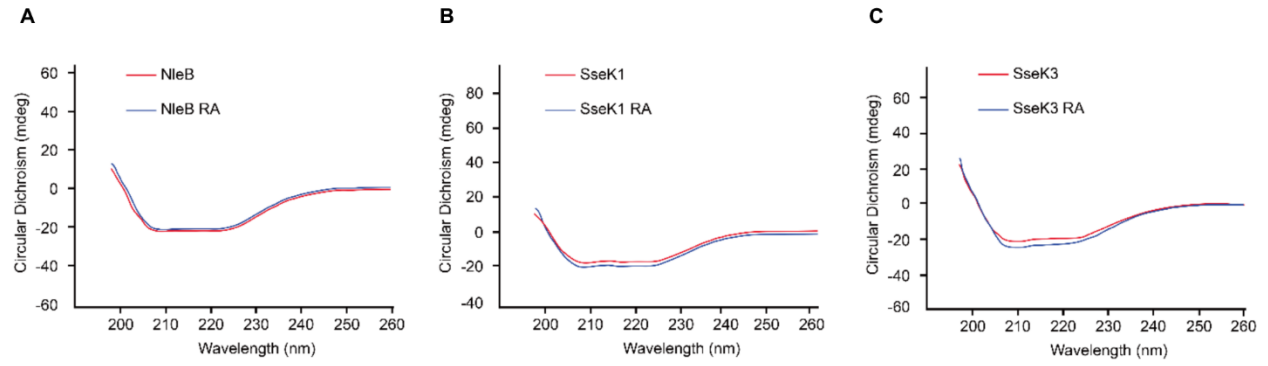

**Supplementary Figure 7 Circular dichroism (CD) spectra of NieB/NieB RA (A), SseK1/SseK1 RA (B), and SseK3/SseK3 RA (C).** All proteins were prepared at a concentration of 0.22 mg/ml in 10 mM sodium phosphate pH 7.4.

**Table S1 EPEC strains used in this study**

| <b>Name</b>               | <b>Reference</b>  |
|---------------------------|-------------------|
| E2348/69                  | (Li et al., 2013) |
| EPEC $\Delta escN$        | (Li et al., 2013) |
| SC3909                    | (Li et al., 2013) |
| SC3909+pNleB              | (Li et al., 2013) |
| SC3909+pNleB-DxD          | (Li et al., 2013) |
| SC3909+pNleB-Flag         | This study        |
| SC3909+pNleB-DxD-Flag     | This study        |
| SC3909+pNleB-HA           | This study        |
| SC3909+pNleB-DxD-HA       | This study        |
| $\Delta escN$ +pNleB-HA   | This study        |
| $\Delta escN$ +pNleB-Flag | This study        |
| SC3909+pNleB (4RA)-HA     | This study        |
| SC3909+pNleB R13A-HA      | This study        |
| SC3909+pNleB R53A-HA      | This study        |
| SC3909+pNleB R159A-HA     | This study        |
| SC3909+pNleB R293A-HA     | This study        |



**Table S2 *Salmonella* strains used in this study**

| <b>Name</b>                                           | <b>Reference</b> |
|-------------------------------------------------------|------------------|
| <i>Salmonella enterica</i> serovar Typhimurium SL1344 | This study       |
| SL1344+Vector                                         | This study       |
| SL1344 $\Delta sseK1/2/3$ +Vector                     | This study       |
| SL1344 $\Delta sseK1/2/3$ +pSseK1-Flag                | This study       |
| SL1344 $\Delta sseK1/2/3$ +pSseK1 (3RA)-Flag          | This study       |
| SL1344 $\Delta sseK1/2/3$ +pSseK2-Flag                | This study       |
| SL1344 $\Delta sseK1/2/3$ +pSseK3-Flag                | This study       |
| SL1344 $\Delta sseK1/2/3$ +pSseK3 (4RA)-Flag          | This study       |
| SL1344 $\Delta sseK1/2/3$ +pSseK3-DxD-Flag            | This study       |

**Table S3 Plasmids used in this study**

| <b>Plasmid</b>          | <b>Reference</b>                     |
|-------------------------|--------------------------------------|
| pET28a-SseK1-Flag       | This study                           |
| pET28a-SseK2-Flag       | This study                           |
| pET28a-SseK3-Flag       | This study                           |
| pET28a-SseK3-DxD-Flag   | This study                           |
| pET28a-SseK1 (3RA)-Flag | This study                           |
| pET28a-SseK3 (4RA)-Flag | This study                           |
| pTRC99A                 | This study                           |
| pTRC99A-NleB            | This study                           |
| pTRC99A-NleB-DxD        | This study                           |
| pTRC99A-NleB-DxD-Flag   | This study                           |
| pTRC99A-NleB-HA         | This study                           |
| pTRC99A-NleB-DxD-HA     | This study                           |
| pTRC99A-NleB (4RA)-HA   | This study                           |
| pTRC99A-NleB R13A-HA    | This study                           |
| pTRC99A-NleB R53A-HA    | This study                           |
| pTRC99A-NleB R159A-HA   | This study                           |
| pTRC99A-NleB R293A-HA   | This study                           |
| pCS2-1Flag-TRADD        | (Li et al., 2013; Ding et al., 2019) |

|                            |                                      |
|----------------------------|--------------------------------------|
| pCS2-1Flag-TRADD (95-312)  | (Li et al., 2013; Ding et al., 2019) |
| pCS2-1Flag-FADD            | (Li et al., 2013)                    |
| pCS2-1Flag-RIPK1 DD        | (Li et al., 2013)                    |
| pCS2-1Flag-TNFR1 (350-445) | (Li et al., 2013)                    |
| pCS2-3Flag-TRADD           | (Li et al., 2013)                    |
| pCS2-3Flag-TRADD (95-312)  | (Li et al., 2013)                    |
| pCS2-3Flag-NleB            | This study                           |
| pCS2-3Flag-NleB (4RA)      | This study                           |
| pCS2-3Flag-NleB R13A       | This study                           |
| pCS2-3Flag-NleB R53A       | This study                           |
| pCS2-3Flag-NleB R159A      | This study                           |
| pCS2-3Flag-NleB R293A      | This study                           |
| pCS2-3Flag-SseK1           | This study                           |
| pCS2-3Flag-SseK1 (3RA)     | This study                           |
| pCS2-3Flag-SseK1 R30A      | This study                           |
| pCS2-3Flag-SseK1 R158A     | This study                           |
| pCS2-3Flag-SseK1 R339A     | This study                           |
| pCS2-3Flag-SseK2           | This study                           |
| pCS2-3Flag-SseK3           | This study                           |
| pCS2-3Flag-SseK3 (4RA)     | This study                           |

|                        |                                      |
|------------------------|--------------------------------------|
| pCS2-3Flag-SseK3 R153A | This study                           |
| pCS2-3Flag-SseK3 R184A | This study                           |
| pCS2-3Flag-SseK3 R305A | This study                           |
| pCS2-3Flag-SseK3 R335A | This study                           |
| pCS2-EGFP-NleB         | (Li et al., 2013; Ding et al., 2019) |
| pCS2-EGFP-NleB-DxD     | (Li et al., 2013; Ding et al., 2019) |
| pCS2-EGFP-SseK1        | (Li et al., 2013; Ding et al., 2019) |
| pCS2-EGFP-SseK2        | This study                           |
| pCS2-EGFP-SseK3        | This study                           |
| pET28a-His             | This study                           |
| pET28a-His-NleB        | This study                           |
| pET28a-His-NleB (4RA)  | This study                           |
| pET28a-His-SseK1       | This study                           |
| pET28a-His-SseK1 (3RA) | This study                           |
| pET28a-His-SseK2       | This study                           |
| pET28a-His-SseK3       | This study                           |
| pET28a-His-SseK3 (4RA) | This study                           |

---

Ding, J., Pan, X., Du, L., Yao, Q., Xue, J., Yao, H., et al. (2019). Structural and Functional Insights into Host Death Domains Inactivation by the Bacterial Arginine GlcNAcyltransferase Effector. *Mol Cell* 74(5), 922-935 e926. doi: 10.1016/j.molcel.2019.03.028.

Li, S., Zhang, L., Yao, Q., Li, L., Dong, N., Rong, J., et al. (2013). Pathogen blocks host death receptor signalling by arginine GlcNAcylation of death domains. *Nature* 501(7466), 242-246. doi: 10.1038/nature12436.
